# Supplementary material for: Ex vivo modelling of PD-1/PD-L1 immune checkpoint blockade under acute, chronic, and exhaustion-like conditions of T-cell stimulation
Source: PubMed Central journal article supplement (PMC7889918; doi:10.1038/s41598-021-83612-3), 2021-02-17
Supplement: 41598_2021_83612_MOESM1_ESM.pdf [file 41598_2021_83612_MOESM1_ESM.pdf]

# ***Ex vivo* modelling of PD-1/PD-L1 immune checkpoint blockade under acute, chronic, and exhaustion-like conditions of T-cell stimulation**

Alexander Roberts<sup>1</sup>, Lindsay Bentley<sup>2</sup>, Tina Tang<sup>1,2</sup>, Fay Stewart<sup>2</sup>, Chiara Pallini<sup>2</sup>, Joel Juvvanapudi<sup>2</sup>, Graham Wallace<sup>3</sup>, Alison J. Cooper<sup>1</sup>, Aaron Scott<sup>3</sup>, David Thickett<sup>3</sup>, Sebastian T. Lugg<sup>3</sup>, Hollie Bancroft<sup>7</sup>, Bridget Hemming<sup>7</sup>, Charlotte Ferris<sup>7</sup>, Gerald Langman<sup>7</sup>, Andrew Robinson<sup>7</sup>, Joanne Chapman<sup>7</sup>, Babu Naidu<sup>7</sup>, Thomas Pinkney<sup>4</sup>, Graham S. Taylor<sup>5</sup>, Kristian Brock<sup>6</sup>, Zania Stamataki<sup>5</sup>, Catherine A. Brady<sup>2</sup>, S. John Curnow<sup>2</sup>, John Gordon<sup>2</sup>, Omar Qureshi<sup>1,2</sup>, Nicholas M. Barnes<sup>1\*</sup>

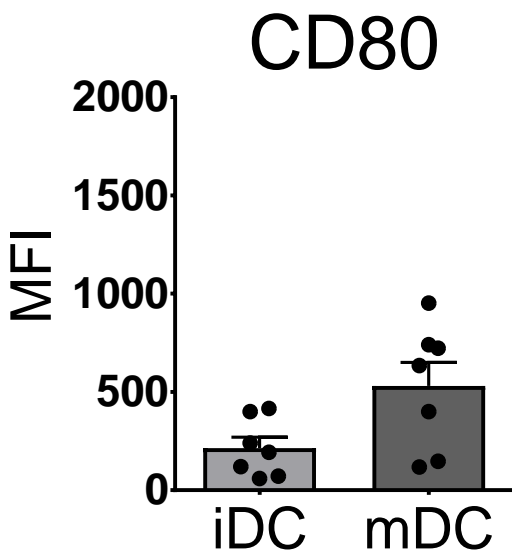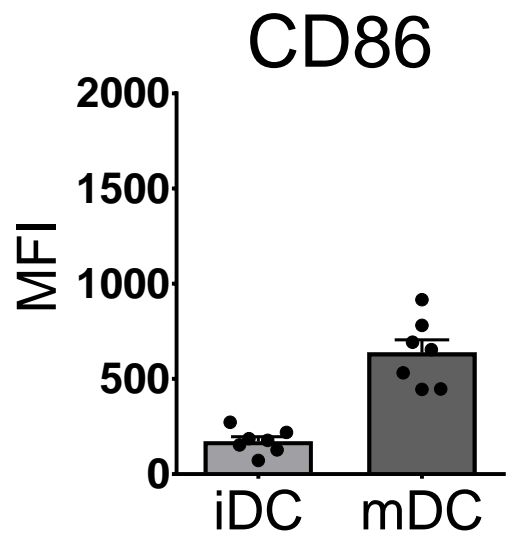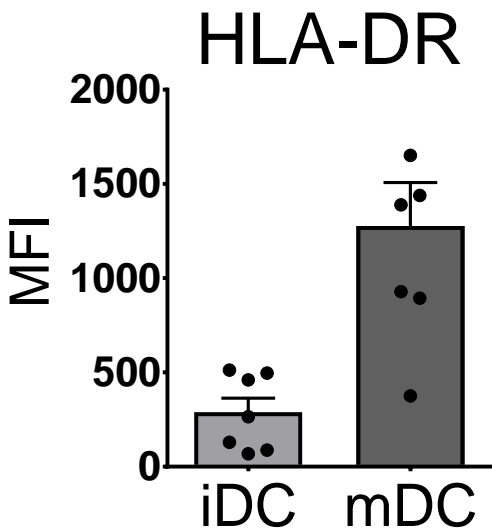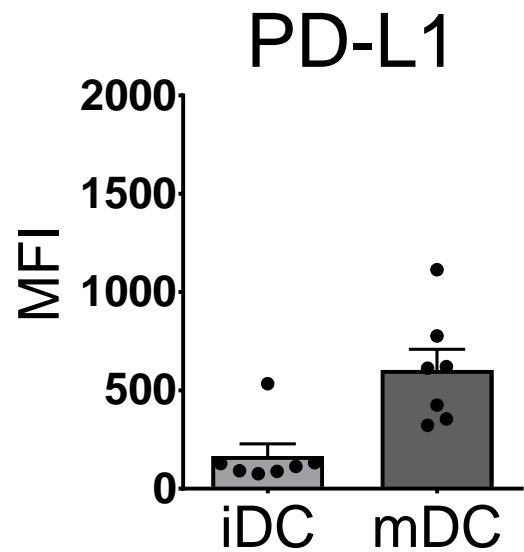

**Supplementary Figure 1: Surface marker expression on mature dendritic cells**

Maturation of dendritic cells (from immature [iDC] to mature [mDC]) is accompanied by an increase in expression of cell surface markers (CD80, CD86, HLA-DR and PD-L1). Data presented as mean fluorescent intensity (MFI), mean+SEM (and individual values), n=7.

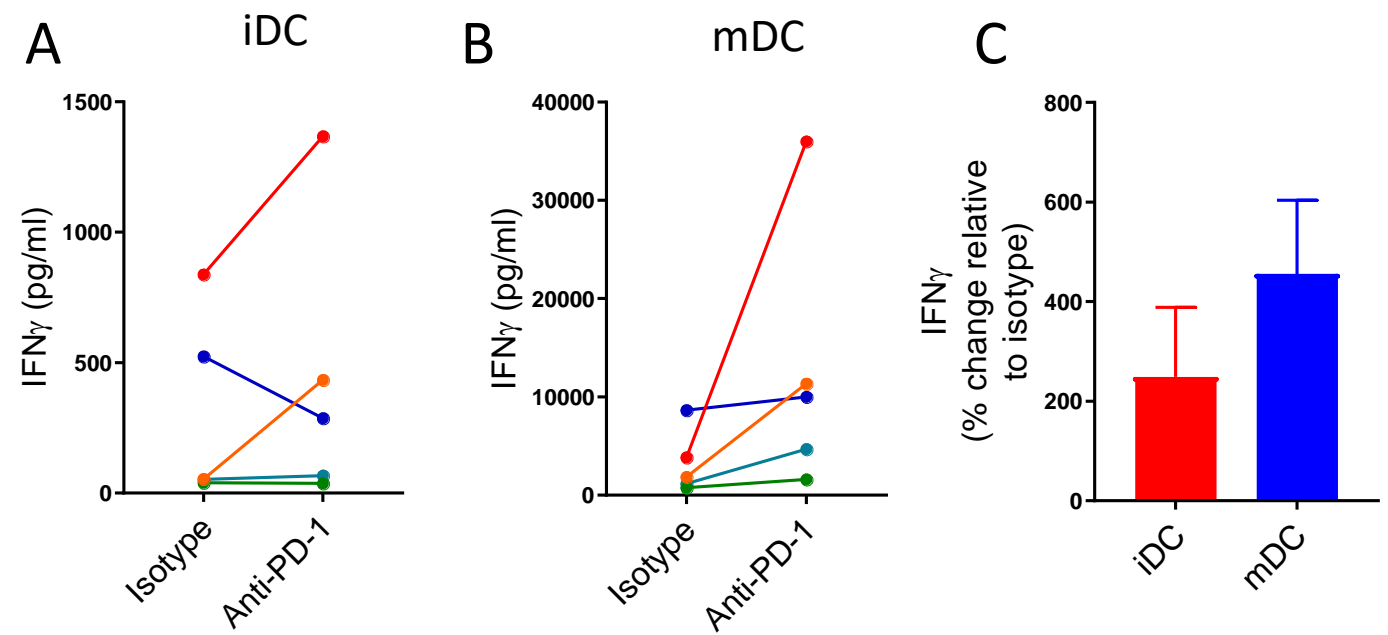

**Supplementary Figure 2: Effects of pembrolizumab on purified CD8<sup>+</sup> T cells in an allogeneic DC stimulation.**

Ability of pembrolizumab ( $\alpha$ -PD-1, 1.0  $\mu$ g/ml) to modify IFN $\gamma$  levels in co-cultures of CD8<sup>+</sup> T cells and allogeneic immature or mature dendritic cells (iDC or mDC respectively) relative to isotype control. **A** and **B** demonstrate responses to individual donors (each colour represents an individual donor), **C** indicates percentage change in response in the presence of pembrolizumab relative to isotype control (mean+SEM, n=5).

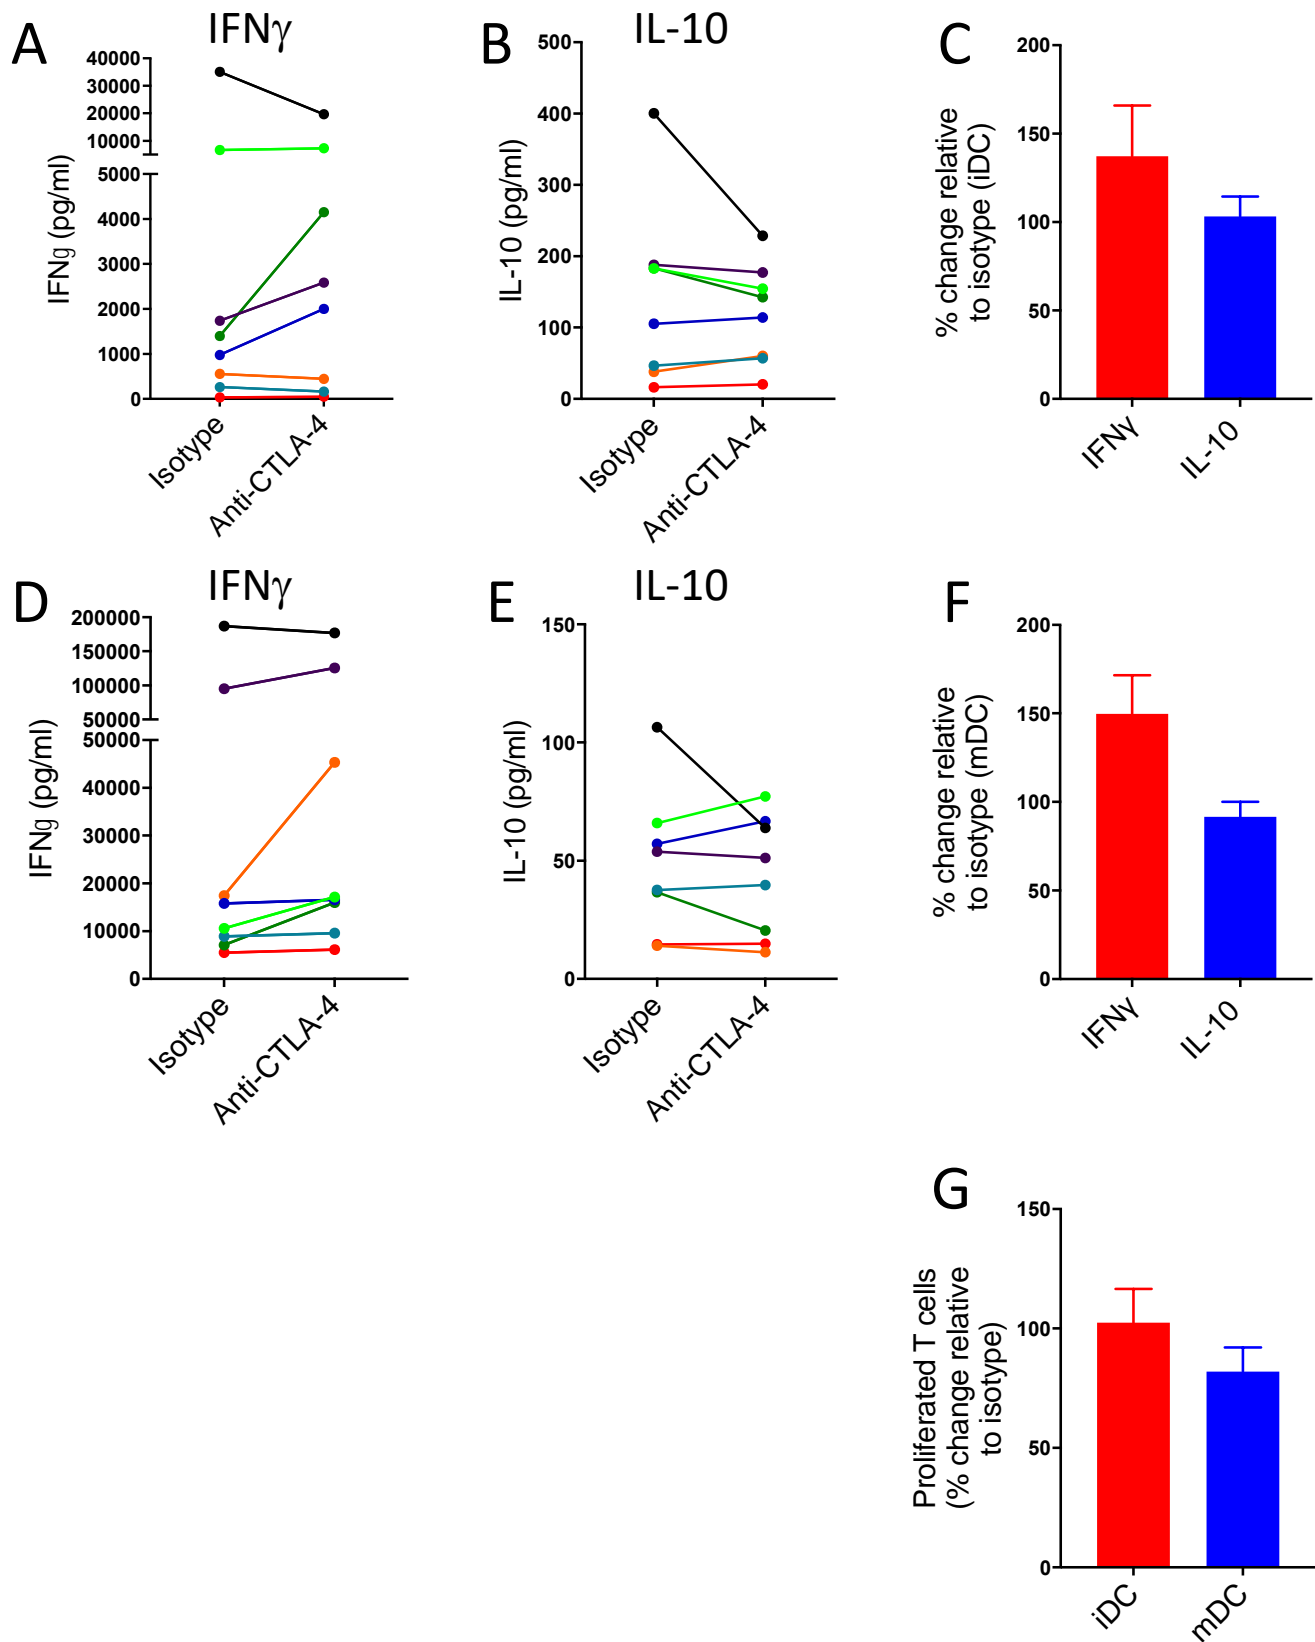

**Supplementary Figure 3: Effects of ipilimumab on purified CD4<sup>+</sup> T cells in an allogeneic DC stimulation.**

Ability of ipilimumab (anti-CTLA-4, 1.0  $\mu$ g/ml) to modify IFN $\gamma$  (A and D) or IL-10 (B and E) levels in co-cultures of CD4<sup>+</sup> T cells and allogeneic immature (A - C) or mature (D - F) dendritic cells relative to isotype control. A, B, D and E indicate responses of individual donors (each colour represents an individual donor), C and F show percentage change in response in the presence of ipilimumab relative to isotype control (mean+SEM, n=8). G Shows impact of ipilimumab upon CD4<sup>+</sup> T cell proliferation in the presence of allogeneic immature or mature dendritic cells. Data presented as percentage change relative to isotype (mean+SEM, n=8).

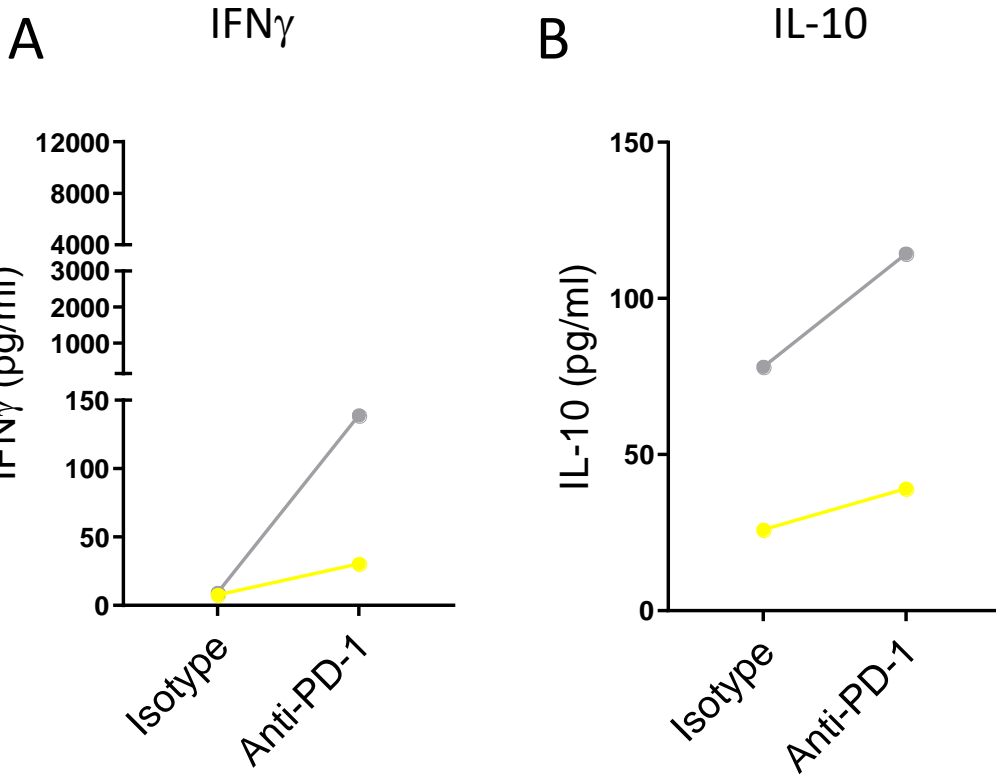

**Supplementary Figure 4: PD-L1 scoring in lung tumours correlates with response to anti-PD-1 treatment.**

Ability of pembrolizumab (anti-PD-1; 1.0  $\mu\text{g/ml}$ ) to modify IFN $\gamma$  (**A**) or IL-10 (**B**) secretion by dissociated tumour cells from lung tumours stimulated with allogeneic mature dendritic cells. The patient represented by the grey line had a PD-L1 score of 55% (based on percentage of tumour cells expressing PD-L1 from pathologist's report) and showed a greater response (cytokine secretion) to pembrolizumab compared to the patient represented by the yellow line which had a PD-L1 score of < 1%, suggesting a correlation between PD-L1 expression by lung tumour cells and ability of infiltrating lymphocytes to respond to PD-1 treatment. n=2.

**A**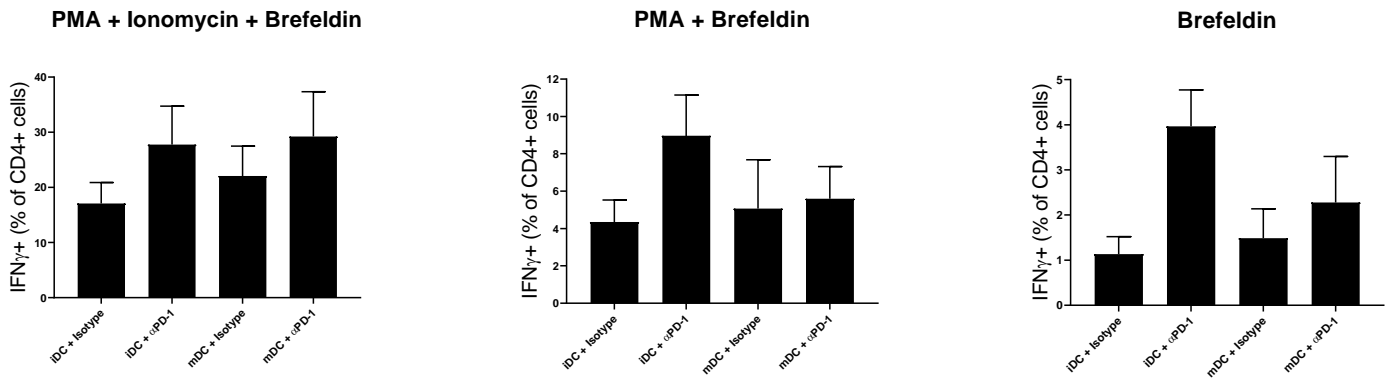**B**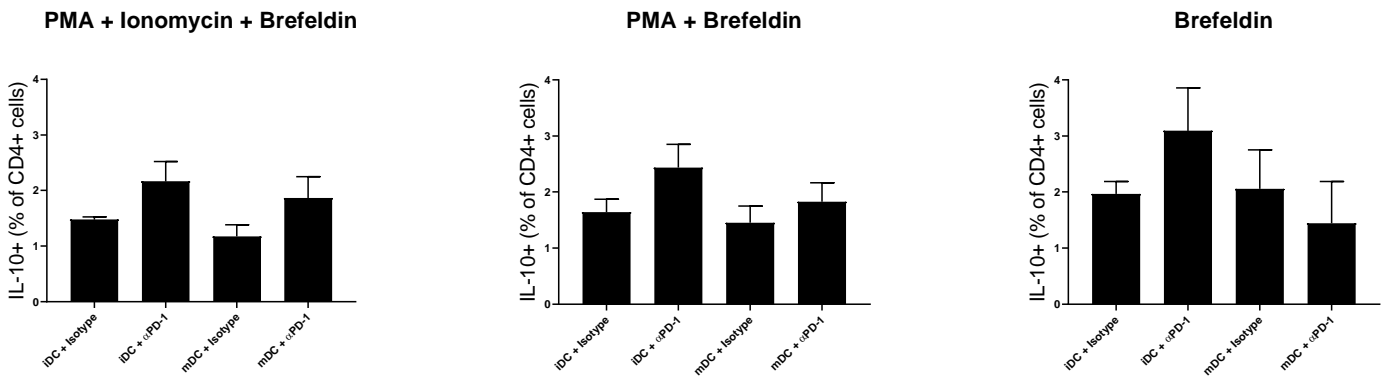

### Supplementary Figure 5: Intracellular cytokine labelling of exhausted CD4<sup>+</sup> T cells.

Ability of pembrolizumab ( $\alpha$ -PD-1; 1.0  $\mu$ g/ml) to modify IFN $\gamma$  (A) or IL-10 (B) expression following stimulation with PMA + Ionomycin + brefeldin, PMA + brefeldin or brefeldin alone in co-cultures of CD4<sup>+</sup> T cells pre-stimulated for 14 days with PHA (5.0  $\mu$ g/ml) and allogeneic immature or mature dendritic cells (iDC or mDC) relative to isotype control. Data presented as percentage of IFN $\gamma$  or IL-10 expressing CD4<sup>+</sup> T cells, mean+SEM, n=4.
